# Supplementary material
Source: PubMed Central journal article supplement (PMC4420909)
Supplement: JB.00130-15_zjb999093620so1.pdf [file JB.00130-15_zjb999093620so1.pdf]

1 **Supplemental Text.**

2

3 **Expanded Materials and Methods.**

4

5 **Genomic DNA preparation.** Cells were washed once with TE buffer (10 mM Tris•HCl, pH 8.0;  
6 1 mM EDTA, pH 8.0) and resuspended in 180 µL enzymatic lysis buffer (20 mM Tris•HCl, pH  
7 8.0; 2 mM sodium EDTA; 1.2% Triton X-100) amended with 20 mg/mL lysozyme, 10 µL of a 2.5  
8 kU/mL mutanolysin stock, and 15 µL of a 10 mg/mL pre-boiled RNase A stock. Samples were  
9 incubated at 37°C for 1-2 hours prior to proteinase K treatment and column purification of gDNA  
10 using the Qiagen DNeasy Blood and Tissue kit per the manufacturer's instructions. *E. coli* gDNA  
11 was isolated using the same method except mutanolysin was not included.

12

13 **Pacific Biosciences SMRT sequencing.** SMRT sequencing of native and WGA *E. faecalis*  
14 OG1RF gDNA was performed at the University of California San Diego BIOGEM core facility.  
15 800 bp insert libraries were built using the Sequencing kit 2.0 as described in the SMRTbell  
16 Template Preparation workflow (1). Libraries were sequenced using 2 x 45 minute movies and 3  
17 SMRT cells for OG1RF native gDNA and 4 SMRT cells for OG1RF WGA DNA. SMRT  
18 sequencing reads were assembled to the *E. faecalis* OG1RF reference sequence (Genbank  
19 accession NC\_017316). Mean read lengths obtained were 3227 and 3760 bases for OG1RF  
20 native and WGA DNA, respectively.

21

22 SMRT sequencing of *E. coli* BL21DE3 gDNA after overexpression of predicted MTases was  
23 performed at the University of Michigan sequencing core facility using P6-C4 chemistry. The  
24 gDNA of *E. coli* BL21DE3 with induced empty vector pET28a was sequenced as negative  
25 control. Two SMRT cells were sequenced for each sample. SMRT sequencing reads were  
26 assembled to the *E. coli* BL21DE3 reference sequence (Genbank accession CP001509.3).

27 Mean read lengths obtained were 9315, 5745 and 8557 bases for *E. coli* BL21DE3 containing  
28 induced pET28a, pWH21 and pWH51, respectively.

29

30 The interpulse duration (IPD) is the time elapsed between incorporation of adjacent nucleotides  
31 by DNA polymerase, and the IPD ratio refers to the ratio of IPD values between native and  
32 control templates for a given nucleotide position. The significance of the IPD ratio is evaluated  
33 using Welch's t-test, with the resulting p-value further transformed into a quality value (QV;  $QV$   
34  $= -10\log p\text{-value}$ ; details can be found at <https://github.com/PacificBiosciences/kineticsTools>).  
35 The IPD data generated from the control (OG1RF WGA or BL21DE3 with induced pET28a)  
36 library were analyzed using the RS\_Modification\_and\_Motif\_Analysis.1 protocol in the SMRT  
37 Portal (v1.3.3 or v2.3.0, respectively) using default analysis parameters. The IPD data  
38 generated from the native gDNA library were then analyzed using the same protocol with the  
39 control result as post-processing. This calculated the IPD ratio at each genomic position by  
40 dividing the IPD from native DNA with that from control DNA. Modified sequence motifs were  
41 also predicted by the analysis. Additional analyses of motif enrichment were performed with  
42 MEME (2).

43

44 **Illumina MiSeq whole genome bisulfite sequencing.** Bisulfite-converted Illumina sequencing  
45 libraries were constructed using the Illumina TruSeq Sample Prep (LT) Kit and the Qiagen  
46 EpiTect Bisulfite kit. *E. coli* strains BW25113 and JW1944 (*dcm*-) (3, 4) were used as positive  
47 and negative controls for bisulfite conversion due to the well characterized Dcm methylation  
48 system. The *dcm*- mutation in JW1944 was confirmed by PCR (data not shown). OG1RF WGA  
49 control DNA was also used as negative control. Briefly, DNA was fragmented using a Bioruptor  
50 Sonicator UCD-200, and 200-500 bp fragments were gel-extracted and end-repaired. After  
51 adapter ligation, bisulfite conversion was performed using the Qiagen EpiTect Bisulfite kit per  
52 the manufacturer's instructions, followed by an eight cycle PCR amplification using Taq

53 polymerase (NEB) and a primer cocktail provided by the TruSeq Kit. Illumina sequencing was  
54 performed on an Illumina MiSeq with 2x150 paired end sequencing.

55

56 Illumina sequence reads were mapped to the OG1RF reference sequence or the *E. coli* K12  
57 MG1655 reference sequence (GenBank accession number: NC\_000913) using Bismark (5) with  
58 paired-end read mapping based on Bowtie2 (6). In read mappings, every C position could be  
59 represented either as a C (protected from bisulfite conversion) or a thymidine (T; bisulfite-  
60 converted cytosine). We observed that bisulfite conversion failed for a subset of input DNA  
61 (discussed further below). To correct for this, we determined the bisulfite conversion rate for  
62 individual reads by dividing the number of C-to-T conversions in each mapped read by the total  
63 number of Cs in the corresponding reference sequence. For determination of methylation ratios,  
64 only reads with  $\geq 80\%$  bisulfite conversion rate were used. A sequencing depth threshold of  $\geq 7$   
65 was further applied to reduce bias generated by low coverage.

66

67 The methylation ratio for each C position in the reference genome was calculated by dividing  
68 the number of Cs mapped by the total coverage at that position. The significance of the  
69 methylation ratio was calculated using empirical modeling, with OG1RF WGA or *dcm*- DNA as  
70 the background (negative control) observation. Briefly, our null hypothesis is that no C  
71 methylation exists in native/*dcm*+ DNA, meaning that the distributions of methylation ratios in  
72 native/*dcm*+ and control DNA are the same. To assess whether a given methylation ratio in  
73 native/*dcm*+ DNA significantly differs from background, we calculated the occurrence of C  
74 positions from negative control with larger than or equal to the given methylation ratio in native  
75 DNA, which was further divided by the total number of C positions from the negative control.  
76 Zero frequency was represented by one over the total number of C positions from the negative  
77 control. The proportion of C positions in the negative control with methylation ratios as extreme  
78 as those in native DNA represents an empirical p-value. The lower the p-value, the more

79 significantly the methylation ratio is different from background. The quality value was  $-10\log$   
80 transformed p-value. Quality values larger than 40 or empirical P-values smaller than  $e^{-4}$  were  
81 considered as significant methylated positions. The detection rate of 5'-C<sup>5m</sup>CWGG-3' in *E. coli*  
82 strain indicated how well bisulfite sequencing detected m5C.

83

#### 84 **Expanded analysis of SMRT and bisulfite sequencing data.**

85

86 **Expanded analysis of *E. faecalis* SMRT sequencing data.** Table 3 in the main text shows the  
87 modified sequence motifs predicted by the SMRT analysis pipeline for *E. faecalis* OG1RF. To  
88 explore the C modification motifs further, we extracted the nucleotide positions with the top 1000  
89 QVs (most significant IPD ratios) along with 20 bases of upstream and downstream sequence.  
90 The sequences were analyzed for putative modification motifs with MEME (30). For 560  
91 nucleotide positions with high QVs, a consensus GCAGC motif was identified two positions  
92 downstream, which suggests that the high QV positions are actually secondary signals resulting  
93 from methylation at GCAGC motifs (Fig. S2). For 45 nucleotide positions with high QVs, a  
94 consensus 5'-GCWGC-3' motif was identified five positions downstream (Fig. S2). For 78  
95 positions with high QV, a GCTGC motif was identified within surrounding sequence, although  
96 the position relative to the high QV base varied (Fig. S2). No motifs were detected by MEME for  
97 the remaining 317 high QV positions. Broadening this analysis, for the 3610 positions with QV  
98 >40, 1533 positions have a 5'-GCWGC-3' motif nearby (within 20 bases up- or downstream),  
99 out of which 461 positions are surrounded by >1 5'-GCWGC-3' motifs (Table S2B). To further  
100 evaluate the secondary peaks associated with 5'-GCWGC-3' motifs, sequences surrounding  
101 8326 5'-GCWGC-3' motifs were extracted and mean QVs for each position were calculated (Fig.  
102 S2). The underlined positions within motif 5'-N(N<sub>2</sub>)N(N<sub>2</sub>)NNGCWGC-3' have significantly higher  
103 QVs than the remaining positions (p-value =  $6.31e^{-12}$ ). Based on the low detection rate and

104 secondary kinetic signals surrounding 5'-GCWGC-3' motifs, we predicted that these motifs were  
105 modified with m5C.

106

107 **Expanded analysis of *E. faecalis* bisulfite sequencing data.** We used bisulfite sequencing to  
108 explore the extent of m5C modification in the OG1RF genome, with OG1RF WGA DNA and *E.*  
109 *coli dcm+* and *dcm-* strains serving as controls. Illumina reads were mapped to reference  
110 sequences, and visual inspection of the read mappings revealed that some reads contained no  
111 bisulfite conversion at any C position (data not shown). This suggested that bisulfite conversion  
112 had failed for some input DNA. Failure of bisulfite conversion for a subset of input DNA could  
113 strongly bias the identification of methylated Cs.

114

115 To address this confounding factor, we evaluated the bisulfite conversion rate for individual  
116 reads. The bisulfite conversion rate for each read was calculated by dividing the number of C-to-  
117 T conversions in the read by the total number of Cs in the corresponding reference sequence.  
118 By this calculation, a read for which bisulfite conversion failed would have a bisulfite conversion  
119 rate of 0, and a read for which every C position was bisulfite converted would have a bisulfite  
120 conversion rate of 1. Reads containing protected positions (m5C or m4C positions) would be  
121 expected to have a bisulfite conversion rate between 0 and 1. Compared to the high conversion  
122 rate for WGA control DNA and *E. coli* gDNA, the conversion rate per read varies for native  
123 OG1RF gDNA (Fig. S4). Assuming the absence of methylated CpG islands or analogous  
124 features, it is unlikely that reads with bisulfite conversion rates near 0 resulted from DNA that  
125 was methylated at every C position in a 150 base region. We conclude that bisulfite conversion  
126 failed for some input DNA.

127

128 To account for failed bisulfite conversion in a subset of input DNA, reads with bisulfite  
129 conversion ratios <0.8 (<80% bisulfite conversion rate per read) were removed from analysis.

130 The number of mapped reads was reduced after application of this filter (Table S2C); however,  
131 the number of C positions covered was maintained (Table S2D), which suggests an unbiased  
132 distribution of sequencing reads with a low conversion rate. Figure 3 in the main text shows the  
133 distribution of methylation ratios obtained using these filtered assemblies.

134

135 **Expanded analysis of *E. coli* SMRT sequencing data.** The IPD ratio for BL21DE3 with  
136 induced pET28a was calculated using an *in silico* control, which predicts host modifications. For  
137 BL21DE3 with pET28a, we were able to detect 5'-GATC-3' with m6A modification successfully,  
138 modified by DNA adenine methyltransferase (*dam*) (see Table 3 in main text). The IPD ratio for  
139 BL21DE3 with induced pWH21 and pWH51 was calculated using the pET28a result as the  
140 control, which removed baseline modifications (i.e., Dam modification). One cytosine  
141 modification motif was detected for the strain expressing OG1RF\_11823 (5'-CCGG-3', with  
142 underlined nucleotide modified). No modification motifs were detected for the strain expressing  
143 OG1RF\_10790.

144

145 To further explore the modification type, we extracted the nucleotide positions with top 1000  
146 highest QVs as described above for our *E. faecalis* SMRT analysis. The sequence contexts  
147 surrounding those nucleotide positions were analyzed by MEME. For 590 nucleotide positions,  
148 a consensus motif was found to be enriched in the center, indicating a strong primary signal  
149 within 5'-CCGG-3' at the underlined position (Fig. S2). The MEME analysis for the remaining  
150 410 nucleotide positions did not detect a consensus sequence. Based on the center position  
151 enrichment from the MEME analysis, and the fact that this cytosine methylation could be  
152 detected at a relatively lower mean coverage depth (86X), we predicted this modification to be  
153 m4C.

154

155

156

157 For the strain expressing OG1RF\_10790, SMRT analysis failed to detect modification motifs.  
158 However, the presence of m5C DNA modification cannot be excluded, due to insufficient  
159 coverage depth. We extracted the nucleotide positions with the top 1000 highest quality values  
160 and their surrounding sequence contexts and performed a MEME analysis. We were unable to  
161 identify a consensus sequence from these data.

162

163 One concern in using *E. coli* BL21DE3 as the MTase expression host is that the overexpressed  
164 MTases could modify 5'-GATC-3' sequences, which could not be distinguished from the host  
165 Dam modification. To eliminate this possibility, we compared the protein sequences of  
166 OG1RF\_11823 and OG1RF\_10790 to Dam using pairwise alignment. The proteins share only  
167 12.2% and 13.0% amino acid sequence identity, respectively. Based on this and the REBASE  
168 predictions for these enzymes (Table 2 in the main text), we exclude the possibility that  
169 OG1RF\_10790 and OG1RF\_11823 modify 5'-GATC-3'.

170 **References Cited.**

171

172 1. **Travers KJ, Chin CS, Rank DR, Eid JS, Turner SW.** 2010. A flexible and efficient  
173 template format for circular consensus sequencing and SNP detection. *Nucleic Acids*  
174 *Research* **38**:e159.

175 2. **Bailey TL, Boden M, Buske FA, Frith M, Grant CE, Clementi L, Ren J, Li WW, Noble**  
176 **WS.** 2009. MEME SUITE: tools for motif discovery and searching. *Nucleic Acids*  
177 *Research* **37**:W202-208.

178 3. **Baba T, Ara T, Hasegawa M, Takai Y, Okumura Y, Baba M, Datsenko KA, Tomita M,**  
179 **Wanner BL, Mori H.** 2006. Construction of *Escherichia coli* K-12 in-frame, single-gene  
180 knockout mutants: the Keio collection. *Molecular Systems Biology* **2**:2006 0008.

181 4. **Datsenko KA, Wanner BL.** 2000. One-step inactivation of chromosomal genes in  
182 *Escherichia coli* K-12 using PCR products. *Proceedings of the National Academy of*  
183 *Sciences of the United States of America* **97**:6640-6645.

184 5. **Krueger F, Andrews SR.** 2011. Bismark: a flexible aligner and methylation caller for  
185 Bisulfite-Seq applications. *Bioinformatics* **27**:1571-1572.

186 6. **Langmead B, Salzberg SL.** 2012. Fast gapped-read alignment with Bowtie 2. *Nature*  
187 *Methods* **9**:357-359.

188



**Table S1. Primers used.**

| <b>Primer name</b>                        | <b>Sequence</b>                      |
|-------------------------------------------|--------------------------------------|
| pLT06 MCS for                             | TCGCATCCGATTGCAGTATAAA               |
| pLT06 MCS rev                             | ACCTATCACCTCAAATGGTTCG               |
| pAT28 For                                 | CGTATGTTGTGTGGAATTGTG                |
| pAT28 Rev                                 | GGCGATTAAGTTGGGTAACG                 |
| <i>clpX</i> For                           | CGCACACTTTCTGTTGCTG                  |
| <i>clpX</i> Rev                           | CCATCAAATGCTCCACCAAC                 |
| 16S <i>E. faecalis</i> For                | CATGCAAGTCGAACGCTTCT                 |
| 16S <i>E. faecalis</i> Rev                | CCATATATCTACGCATTTTAC                |
| <b><u>Methyl Primers</u></b>              |                                      |
| OG1RF_11844_For                           | GATATTTGTAGGTATATTTTTGTTT            |
| OG1RF_11844_Rev                           | AAATATTACTTTTCATTAATAAAACC           |
| ECD_00002_For                             | TTTTGTATGGTATTAGTTTGTGGG             |
| ECD_00002_Rev                             | TACCATCAACACCATATAATCAACC            |
| <b><u>Generation of OG1RF ΔEfsI</u></b>   |                                      |
| 1F_BamHI                                  | AATGAAGGATCCACCTAAAGCTATTCCTCCTGGA   |
| 1R_XbaI                                   | AGTACATCTAGATCAATCTTAAAAGGTCGTGGCT   |
| 2F_PstI                                   | TCATCTCTGCAGACTCAACAGATAAAGCATCCCC   |
| 2R_BamHI                                  | TTATCTGGATCCGGAAGATTGGATGTAGAGATAACA |
| <b><u>Confirmation of OG1RF ΔEfsI</u></b> |                                      |
| 5F                                        | ACATGCGTAAATCATTGATGTCA              |
| 5R                                        | TATTCTTGGTGTGTCTATCGCC               |
| 3F                                        | GCGTACAGCGTTATCTAAAACC               |
| 3R                                        | CATTAAGCCGTA CTGACCGTAT              |

4F GAACTCCAAAATGGCAATGGAT  
4R TCTAAGCCGTCTTCGATTGAAA

**Construction of pM.EfaRFI**

M1\_F\_EcoRI ccgGAATTCCGATGTAGCTGAATACAAAGGC  
M1\_R\_BamHI cgcGGATCCCAACAGGTTCTATAAGCACTTT

**Construction of pCom02**

RBS\_R\_NotI AAGGAAAAAAGCGGCCGCTGGAAAATAGTGTCAAGAGAAGGA  
ORF\_F\_NotI AAGGAAAAAAGCGGCCGCTTAACCAAAAGGATTAATCTAAAT

**Construction of pWH02**

addProRM Arm1 For PstI aaaactgcagTTTGACTAATTTTTGCCCTGC  
addProRM Arm1 overlap Rev AAAAAATAAGGACGGTTCCTTTATAGGAGCTTCATTTAATGAATAACGCTTAAAGGGAC  
ef2239 R BamHI CGCGGATCCGGTAAACTAGGAGGGAAGCATATG  
ef2239 F GCTCCTATAAAGGAACCGTCCTTATTTTTT

**Construction of pWH03**

ef2239 F GCTCCTATAAAGGAACCGTCCTTATTTTTT  
ef2238 R NotI AAAAAATAAGGACGGTTCCTTTATAGGAGCGCGGCCGCGGTCCTTATTTTTTATTTCTGGCGTGG  
ef2239 R XbaI CTAGTCTAGAGGTAAACTAGGAGGGAAGCATATG  
ef2238 F PstI aaaactgcagCTATAATAGTACTTGAGAAGGAGGC

**In vitro expression**

OG1RF\_11823\_For\_BamHI CGCGGATCCATGAGGACTTTTATGGAAAGTATAA  
OG1RF\_11823\_Rev\_NotI ATAAGAATGCGGCCGCTTATTTCTCCCTACAACGATA  
OG1RF\_10790\_For\_NdeI GGAATTCATATGGTGAATTTTTAGATTTATTTGCC  
OG1RF\_10790\_Rev\_BamHI CGCGGATCCCAATCCTTTAATTGTCTGGCAAT

**pCF10 transconjugant verification**

pCF10\_Tn916 for TTATCACGCTCGGACTATTGAC

|                 |                        |
|-----------------|------------------------|
| pCF10_Tn916 rev | CGATTCAGAAATTGCAGACCTG |
| pCF10_uvaB for  | GATCGAAATCAGCACATGGAAC |
| pCF10_uvaB rev  | TTTGGCTTATCCGTTTAAACCG |

**Quantitative RT\_PCR primers**

|                    |                        |
|--------------------|------------------------|
| RealTime_11622_For | GCAGAGAATGTGGGAGGACT   |
| RealTime_11622_Rev | TTCTTTCTCGTGCTTGTGGC   |
| RealTime_11823_For | TTTTGCGGTTGCGGTACTGT   |
| RealTime_11823_Rev | TTCGAGGTTCAAGTCGCTTACT |
| RealTime_10790_For | GAGCAGAACGTACCCACAA    |
| RealTime_10790_Rev | CCGTTGAGAAAACGCGACTG   |
| RealTime_clpX_For  | GAACGTAATACTGGCGCACG   |
| RealTime_clpX_Rev  | TTTACCGGTACCTTCAGCGG   |

---

**Table S2. Extended analysis of SMRT and bisulfite sequencing data.****Table S2A. *E. faecalis* OG1RF sequence variants detected by SMRT sequencing.**

| Position | Strand | Variant           | Type         | Coverage | Confidence | Overlapping annotation         | Amino acid substitution |
|----------|--------|-------------------|--------------|----------|------------|--------------------------------|-------------------------|
| 23656    | +      | 23656A>G          | Substitution | 272      | 93         | OG1RF_10019; <i>manX2</i>      | Thr>Ala                 |
| 819012   | +      | 819012_819013insT | Insertion    | 100      | 93         | OG1RF_r_10004; 16S rRNA        |                         |
| 819260   | +      | 819260G>A         | Substitution | 45       | 93         | OG1RF_r_10004; 16S rRNA        |                         |
| 819271   | +      | 819271C>T         | Substitution | 44       | 93         | OG1RF_r_10004; 16S rRNA        |                         |
| 1662413  | +      | 1662413C>A        | Substitution | 120      | 93         | OG1RF_11594;<br>oxidoreductase | Ser>Ile                 |

**Table S2B. Analysis of sequences surrounding positions with QV >40 in SMRT sequencing.**

| Quantity of GCWGC in surrounding context | Number of positions | Mean QV <sup>a</sup> | Std QV <sup>a</sup> | Signal enrichment (Percent occurrence) <sup>b</sup>                                                                                                    |
|------------------------------------------|---------------------|----------------------|---------------------|--------------------------------------------------------------------------------------------------------------------------------------------------------|
| 0                                        | 2077                | 48.04                | 66.81               | No enriched motif                                                                                                                                      |
| 1                                        | 1072                | 52.41                | 12.68               | <u>N</u> (N <sub>4</sub> )GCWGC (15.21%) (163/1072)<br><u>N</u> NGCWGC (42.72%) (458/1072)<br><u>G</u> CWGC (17.35%) (186/1072)                        |
| 2                                        | 396                 | 63.64                | 23.45               | <u>N</u> (N <sub>7</sub> )GCWGCWGC (11.11%) (44/396)<br><u>N</u> (N <sub>4</sub> )GCWGCWGC (26.26%) (104/396)<br><u>N</u> NGCWGCWGC (38.64%) (153/396) |
| 3                                        | 55                  | 75.82                | 39.53               | <u>G</u> CWGCWGCWGC (58.18%) (32/55)                                                                                                                   |
| 4                                        | 10                  | 69.40                | 20.12               | Contain at least one GCWGCWGC                                                                                                                          |
| <b>Total (QV&gt;40)</b>                  | 3610                | 51.53                | 52.28               |                                                                                                                                                        |

<sup>a</sup>Mean and standard deviation of QVs for modified positions

<sup>b</sup>Percentage occurrences >10% are shown. The underlined positions indicate positions with QV >40.

**Table S2C. Assembly statistics for bisulfite sequencing.**

|                       | <b>Total reads</b> | <b># of reads mapped to reference sequence<sup>a</sup></b> | <b># of mapped reads after filter<sup>b</sup></b> | <b>% C positions covered<sup>c</sup></b> | <b>Mean coverage depth<sup>c</sup></b> | <b>Mean methylation ratio<sup>d</sup></b> |
|-----------------------|--------------------|------------------------------------------------------------|---------------------------------------------------|------------------------------------------|----------------------------------------|-------------------------------------------|
| <b>OG1RF gDNA</b>     | 7,255,590          | 3,893,581                                                  | 2,927,274                                         | 83.7                                     | 56.03                                  | 0.04286                                   |
| <b>WGA OG1RF gDNA</b> | 1,735,910          | 617,489                                                    | 616,682                                           | 42.1                                     | 20.04                                  | 0.01691                                   |
| <b>BW25113</b>        | 3,806,930          | 1,393,975                                                  | 1392113                                           | 63.6                                     | 20.40                                  | 0.02731                                   |
| <b>JW1944</b>         | 3,722,370          | 1,004,669                                                  | 1003679                                           | 49.6                                     | 17.83                                  | 0.01275                                   |

<sup>a</sup>Paired-end mapping by Bowtie 2

<sup>b</sup>Mapped reads with bisulfite conversion rate <80% were excluded

<sup>c</sup>Conversion rate filter applied; coverage depth threshold applied ( $\geq 7X$  coverage)

<sup>d</sup>Mean methylation ratio for all covered C positions with the conversion rate filter applied

**Table S2D. Number of covered cytosines before and after application of conversion rate filter in bisulfite sequencing.**

| <b>Sample</b> | <b>Total # of cytosine in genome<sup>a</sup></b> | <b># of covered C before filter<sup>b</sup></b> | <b># of covered C after filter</b> | <b># of C after filter and with coverage <math>\geq 7X</math></b> |
|---------------|--------------------------------------------------|-------------------------------------------------|------------------------------------|-------------------------------------------------------------------|
| OG1RF         | 1034280                                          | 1023870 (98.99%)                                | 1020912 (98.71%)                   | 865233 (83.66%)                                                   |
| WGA OG1RF     | 1034280                                          | 903219 (87.33%)                                 | 889553 (86.00%)                    | 435854 (42.14%)                                                   |
| BW25113       | 2356477                                          | 2297949 (97.52%)                                | 2289786 (97.17%)                   | 1498465 (63.59%)                                                  |
| JW1944        | 2356477                                          | 2242744 (95.17%)                                | 2219752 (94.20%)                   | 1169036 (49.61%)                                                  |

<sup>a</sup>Number sums C positions from both strand

<sup>b</sup>Percent coverage is shown in parentheses

**Table S3. Comparison of motif detection in SMRT and bisulfite (BS) sequencing.**

|                           | <b>Motif<sup>a</sup></b>                                  | <b>Sequencing method</b> | <b>% Motif Detected<sup>b</sup></b> | <b>% Covered Motif Detected<sup>c</sup></b> | <b># Motifs Detected<sup>d</sup></b> | <b># Covered Motifs</b> | <b># of Motifs in Genome</b> | <b>Mean QV<sup>e</sup></b> | <b>Mean Motif Coverage</b> |
|---------------------------|-----------------------------------------------------------|--------------------------|-------------------------------------|---------------------------------------------|--------------------------------------|-------------------------|------------------------------|----------------------------|----------------------------|
|                           | <u>GC</u> WGC                                             | BS                       | 83.3%                               | 100%                                        | 6981                                 | 6981                    | 8380                         | 53.4                       | 54.8                       |
| OG1RF                     | <u>GC</u> WGC                                             | SMRT                     | 5.1%                                | 5.10%                                       | 425                                  | 8326                    | 8380                         | 61.6                       | 120.3                      |
|                           | <u>N</u> NGCWGC <u>N</u>                                  | SMRT                     | 9.5%                                | 9.51%                                       | 792                                  | 8326                    | 8380                         | 60.8                       | 121.3                      |
|                           | <u>N</u> (N <sub>4</sub> )GCWGC(N <sub>4</sub> ) <u>N</u> | SMRT                     | 4.2%                                | 4.19%                                       | 349                                  | 8326                    | 8380                         | 59.4                       | 120.2                      |
| <i>E. coli</i><br>BW25113 | <u>CC</u> WGG                                             | BS                       | 66.5%                               | 99.99%                                      | 16032                                | 16033                   | 24100                        | 60.63                      | 20.03                      |

<sup>a</sup>The predicted modified position is underlined.

<sup>b</sup>Percent motif detection was calculated by dividing the number of modified motifs detected by the total number of motifs in the genome.

<sup>c</sup>Percent covered motif detection was calculated by dividing the number of modified motifs detected by the total number of covered motifs in the genome with coverage threshold >7X applied.

<sup>d</sup>Number of modified motifs detected.

<sup>e</sup>Mean QV for modified bases in motifs.

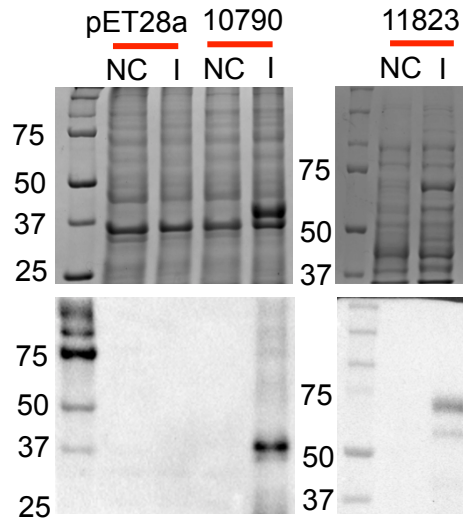

**Figure S1. Overexpression of predicted DNA MTases in *E. coli* BL21DE3.** *E. coli* expressing predicted DNA MTases were induced overnight using IPTG as described in Material and Methods. The crude cell lysate was analyzed on SDS-PAGE by coomassie blue staining (top panel) and western blot (bottom panel). The predicted molecular weights of the OG1RF\_10790 and OG1RF\_11823 proteins are 38.0 kDa and 49.7 kDa, respectively. The OG1RF\_11823 protein has a GST fusion, which increases its molecular weight by 26 kDa. NC, not IPTG-induced; I, induced with 1mM IPTG.

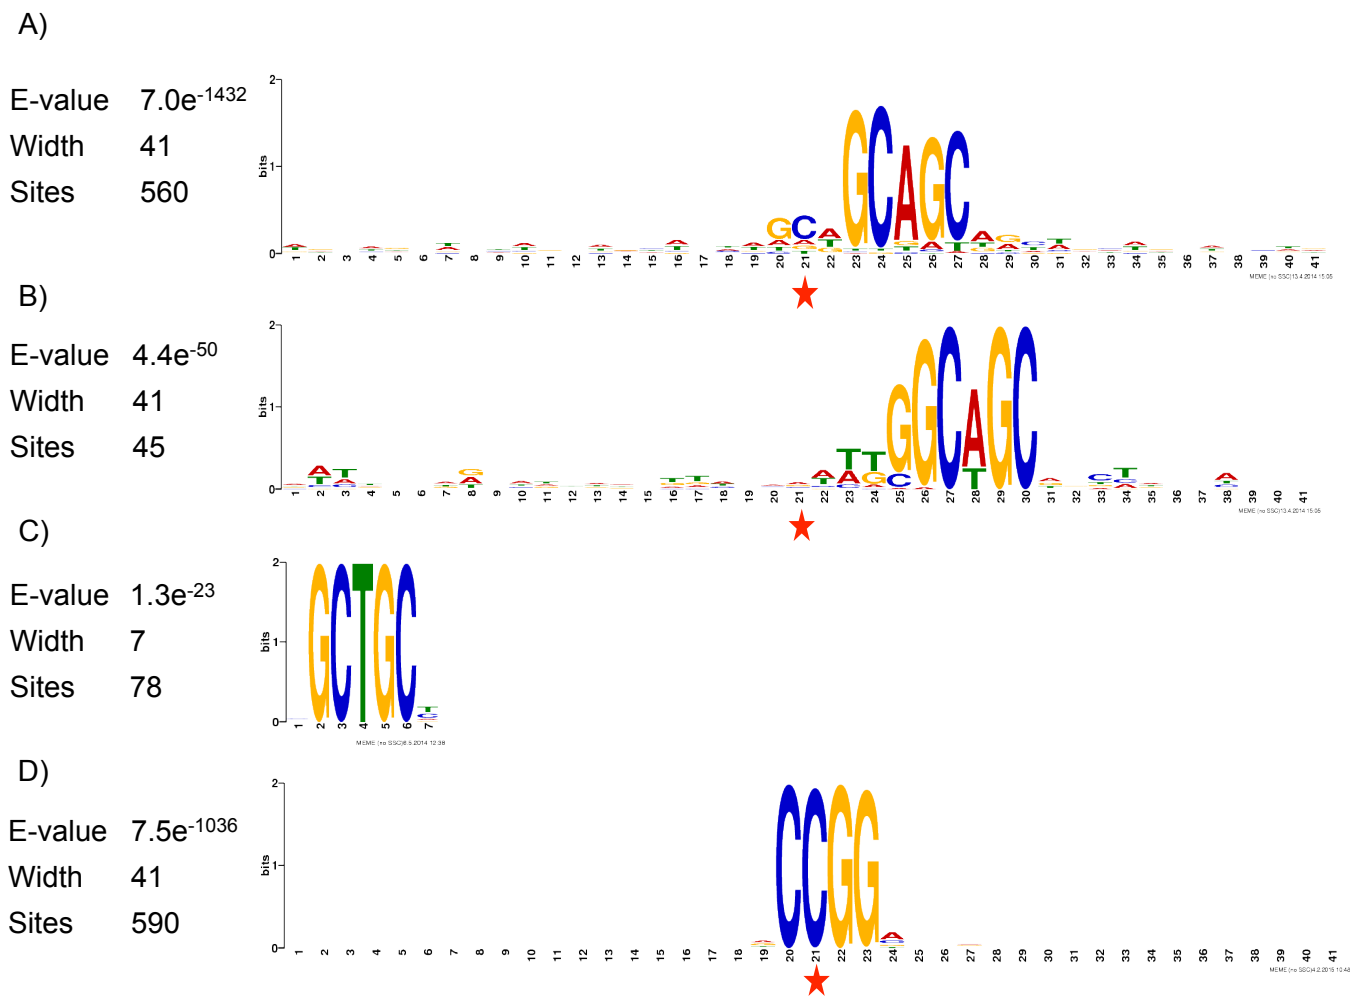

**Figure S2. Motif enrichment within the contexts of top 1000 high QV positions from SMRT sequencing.** MEME was used to analyze sequence surrounding the 1000 nucleotide positions with the highest QVs. Position 21 is the base with high QV, indicated by a red asterisk.

(A-C) In OG1RF SMRT sequencing, similar motifs were found 2 bases (A) and 5 bases (B) downstream of 560 and 45 high QV positions, respectively, indicating that the high QV positions are actually secondary peaks resulting from modification at GCWGC motifs. Excluding the sequences enriched in (A) and (B), GCTGC motifs with varying positions within the 41 base window were detected by MEME for 78 high QV positions (C).

(D) In *E. coli* BL21DE3 with overexpressed OG1RF\_11823 SMRT sequencing, the high QV positions are center enriched at position 21, suggesting a strong primary signal within CCGG motifs. The remaining 410 positions do not share any consensus motif.

Expectation values are shown.



**(A)**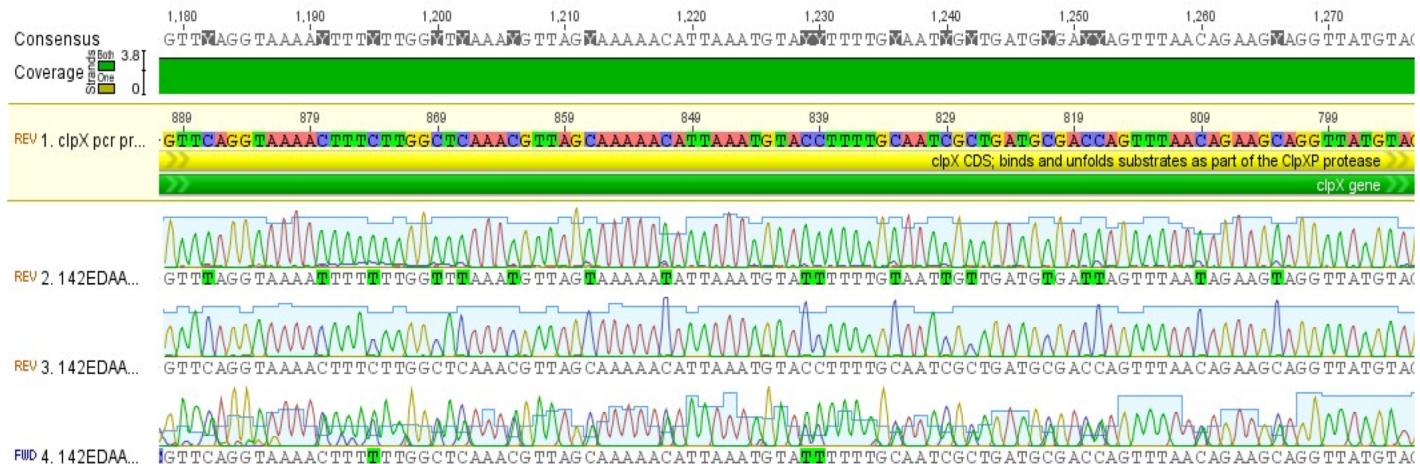**(B)**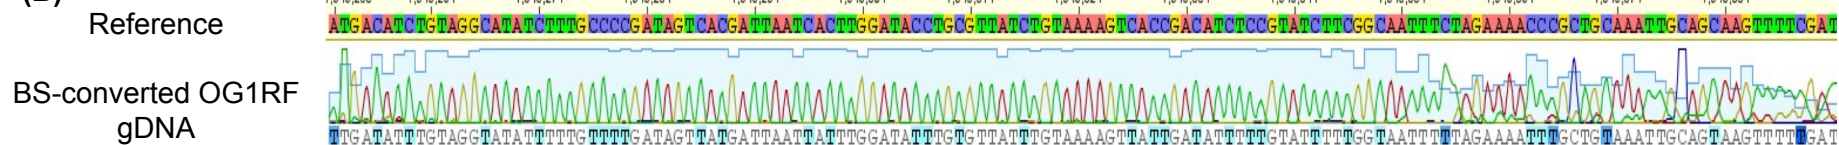**(C)**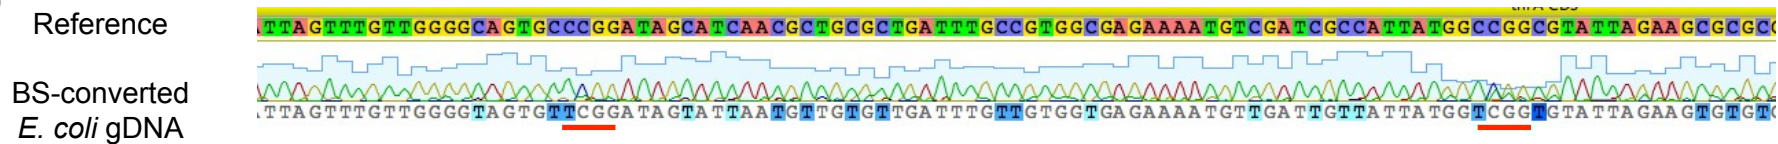

**Fig. S3. (A) Bisulfite-converted PCR products distinguish different cytosine methylations.** The *E. faecalis* OG1RF *clpX* gene was amplified by PCR using dCTP, dm5CTP, or dm4CTP. Products were bisulfite-converted, re-amplified by PCR with dCTP, and then sequenced. The top line shows the OG1RF *clpX* reference sequence. Sequences of bisulfite-converted products are aligned below the reference sequence. For the dCTP PCR product, all C positions have been converted to T. For the dm5CTP PCR product, no C positions have been converted. For the dm4CTP product, mixed C/T signals are observed for every reference C position.

**(B) GCWGC motifs are fully protected from bisulfite conversion.** The *E. faecalis* OG1RF\_11844 gene contains two GCWGC motifs. The “Reference” line above shows OG1RF\_11844 sequence; GCWGC motifs are indicated by red bars below the figure. OG1RF gDNA was bisulfite-converted, OG1RF\_11844 sequence was amplified by PCR with dCTP, and products were sequenced. The “BS converted fragment” shows the PCR product sequence aligned to the reference sequence. All C positions were fully converted to T, except for the internal C positions of the two GCWGC motifs. Those C positions were fully protected from bisulfite conversion, suggesting they are modified by m5C.

**(C) CCGG motifs are partially protected from bisulfite conversion.** The *E. coli* BL21DE3 ECD\_00002 gene contains two CCGG motifs. The “Reference” line above shows BL21DE3 sequence; two CCGG motifs are indicated by red bars below the figure. The gDNA from BL21DE3 with overexpressed OG1RF\_11823 was bisulfite converted and amplified by PCR with dCTP using primers targeting ECD\_00002, and products were sequenced. The “BS converted fragment” shows the sequenced PCR products aligned to reference genome. All C positions were successfully converted to T, except for the internal C of the two CCGG motifs. The mixed population of C and T within CCGG motifs indicates partial protection from bisulfite conversion, suggesting they are modified by m4C.

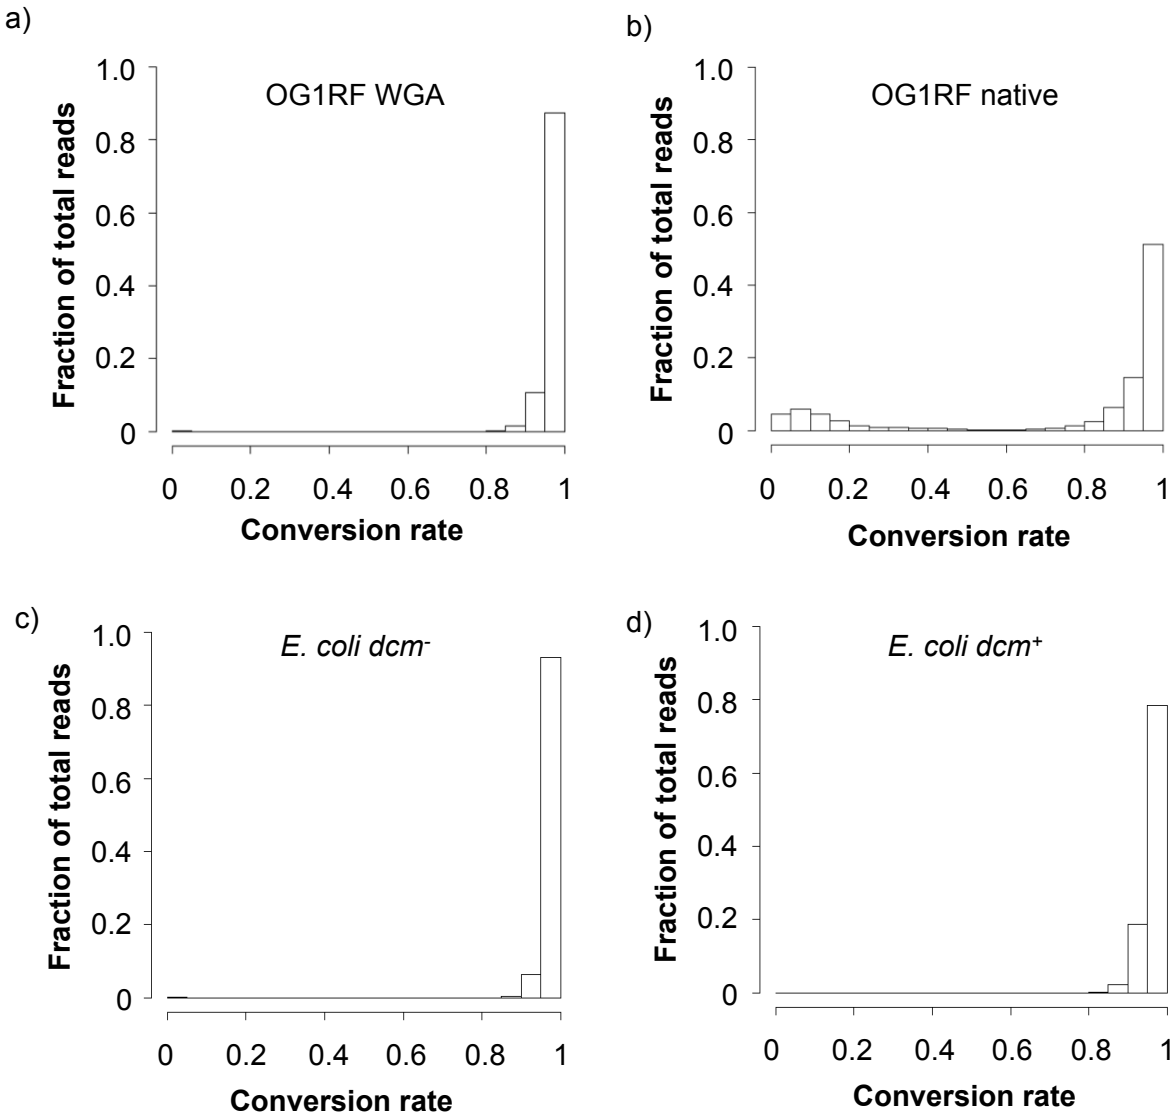

**Figure S4. Evaluation of bisulfite conversion rate for bisulfite sequencing reads.** Bisulfite conversion rate for each sequence read was calculated as described in the text. Graphs show the distribution of conversion rates for mapped sequencing reads in each sample. (A) OG1RF WGA DNA. (B) OG1RF native gDNA. (C) *E. coli dcm*<sup>-</sup>. (D) *E. coli dcm*<sup>+</sup>.
